# Supplementary material
Source: MDPI journal article supplement (https://www.mdpi.com/1996-1073/12/14/2818)
Supplement: s1 [file s1]

Article

# Evaluation of Infrared Radiation Combined with Hot Air Convection for Energy-Efficient Drying of Biomass

**Hany S. EL-Mesery**<sup>1,2</sup>, **Abd El-Fatah Abomohra**<sup>3,4,\*</sup>, **Chan-Ung Kang**<sup>5</sup>, **Ji-Kwang Cheon**<sup>5</sup>, **Bikram Basak**<sup>5</sup> and **Byong-Hun Jeon**<sup>5,\*</sup>

<sup>1</sup> School of Energy and Power Engineering, Jiangsu University, Zhenjiang 212013, China;

<sup>2</sup> Department of Crop Handling and Processing, Agricultural Engineering Research Institute, Agricultural Research Center, Dokki, 12618 Giza, Egypt

<sup>3</sup> New Energy Department, School of Energy and Power Engineering, Jiangsu University, Zhenjiang 212013, China

<sup>4</sup> Botany Department, Faculty of Science, Tanta University, Tanta 31527, Egypt

<sup>5</sup> Department of Earth Resources and Environmental Engineering, Hanyang University, Seoul 04763, Korea

\* Correspondence: abomohra@science.tanta.edu.eg (A.E.-F.A.); bhjeon@hanyang.ac.kr (B.-H.J.)

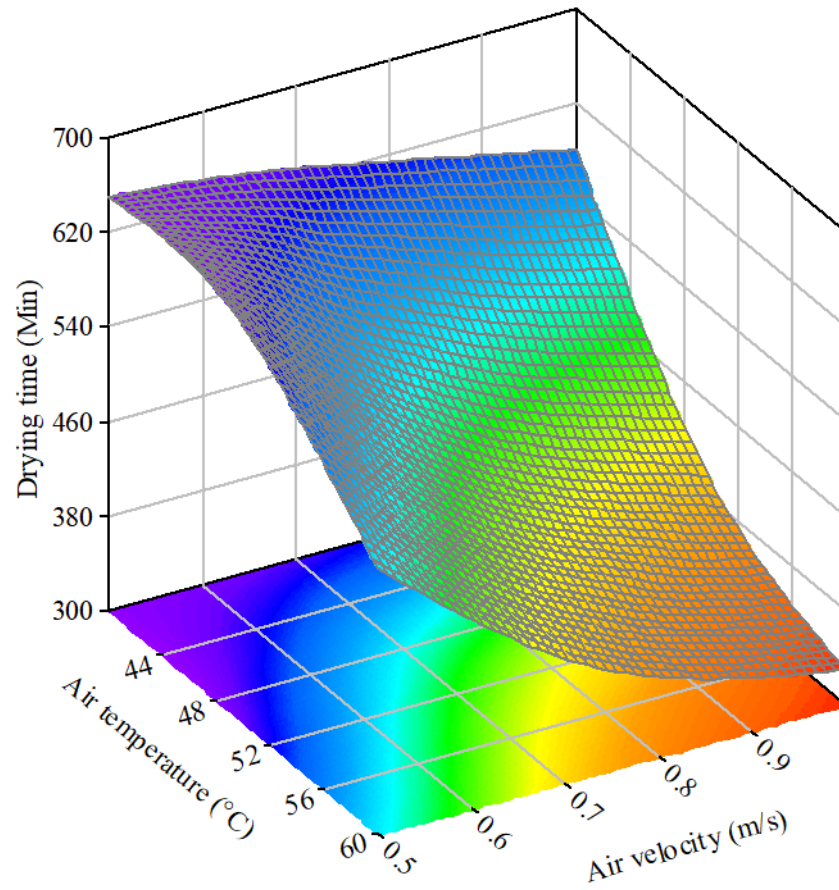

**Figure S1.** Variation of drying time due to change in the drying temperature and drying air velocity using a hot air convection dryer.

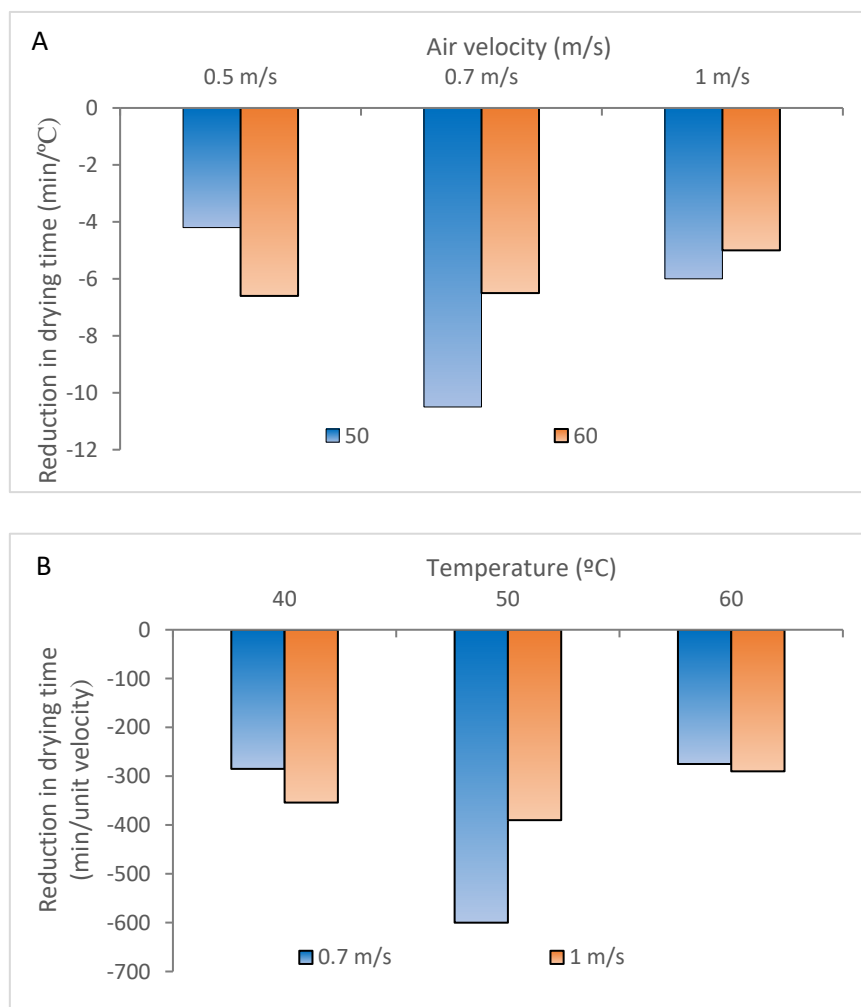

**Figure S2.** The rate of reduction in the drying time at different temperatures (**A**, compared to the drying time at 40 °C) and at different air velocities (**B**, compared to the drying time at 0.5 m/s).

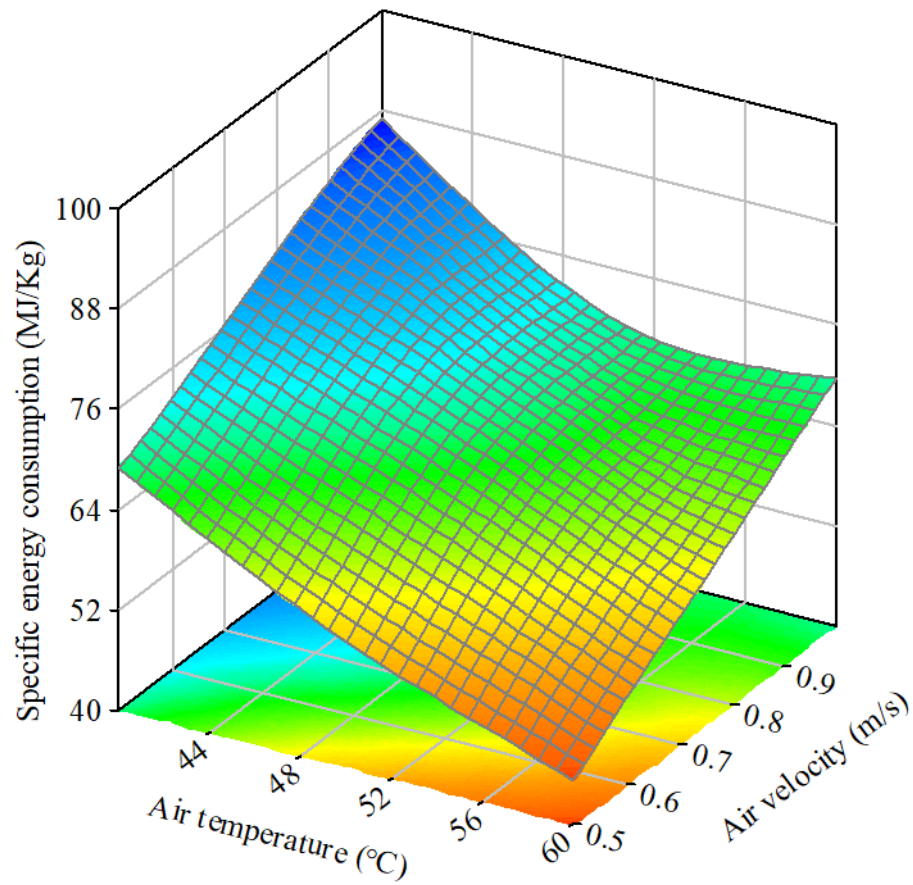

**Figure S3.** Interaction effect of temperature and air velocity on specific energy consumption using a hot air convection dryer.

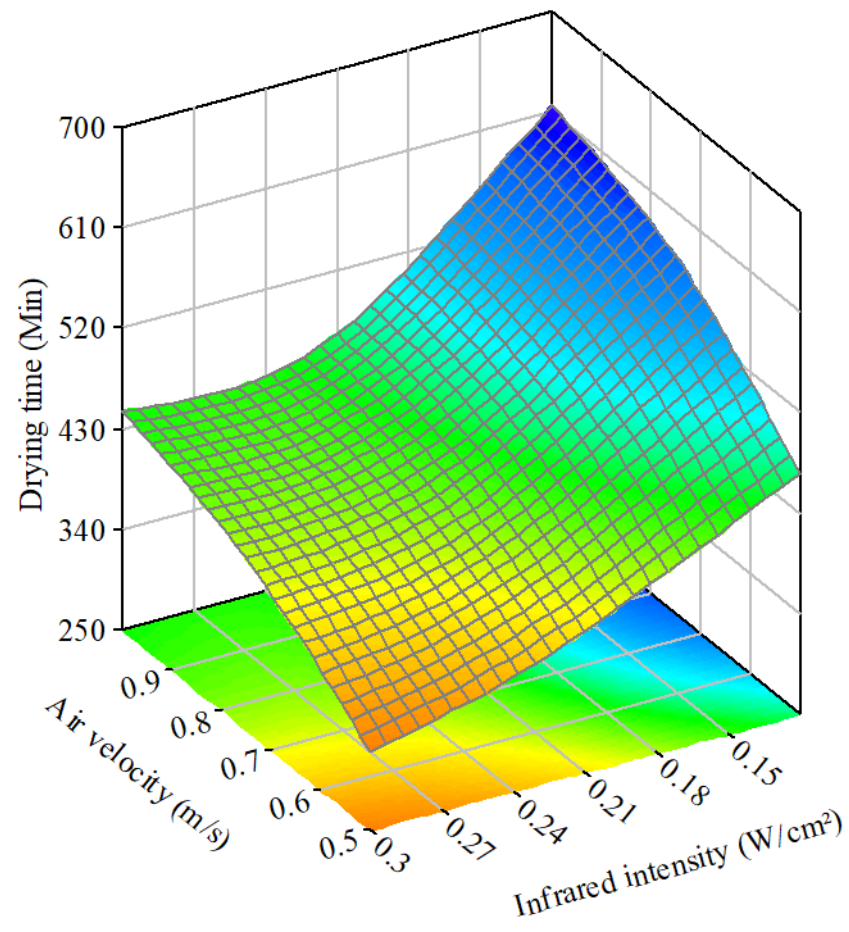

**Figure S4.** Variation of drying time due to change in the drying temperature and drying air velocity using an infrared dryer.

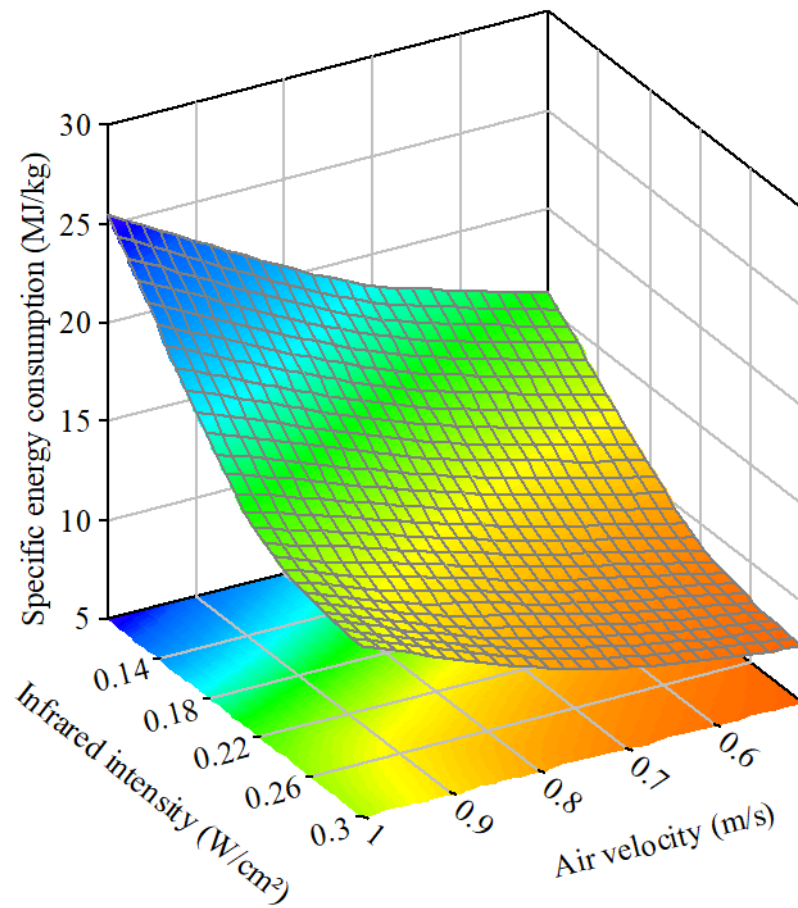

**Figure S5.** Interaction effect of infrared intensity and air velocity on specific energy consumption using infrared drying.

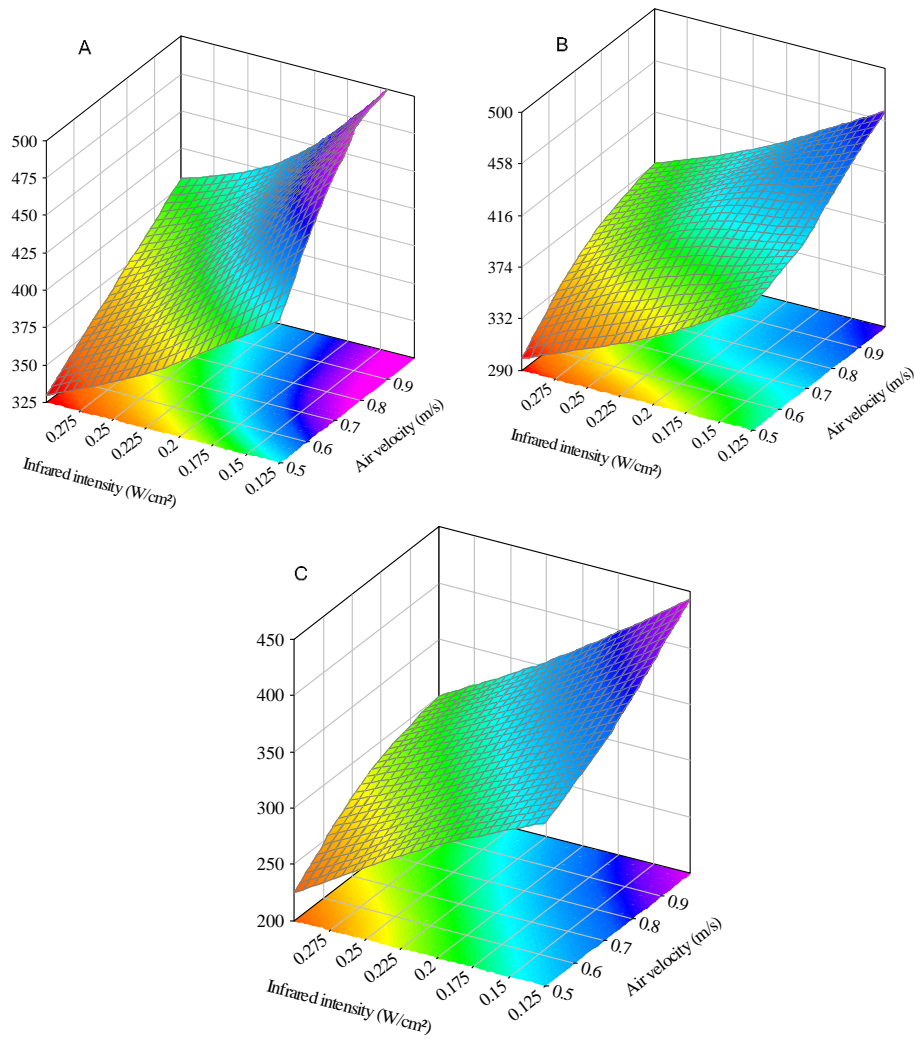

**Figure S6.** Variation of drying time due to changes in infrared radiation intensity at different air velocities using a combined infrared/hot air convection dryer at 40 °C (A), 50 °C (B) and 60 °C (C).

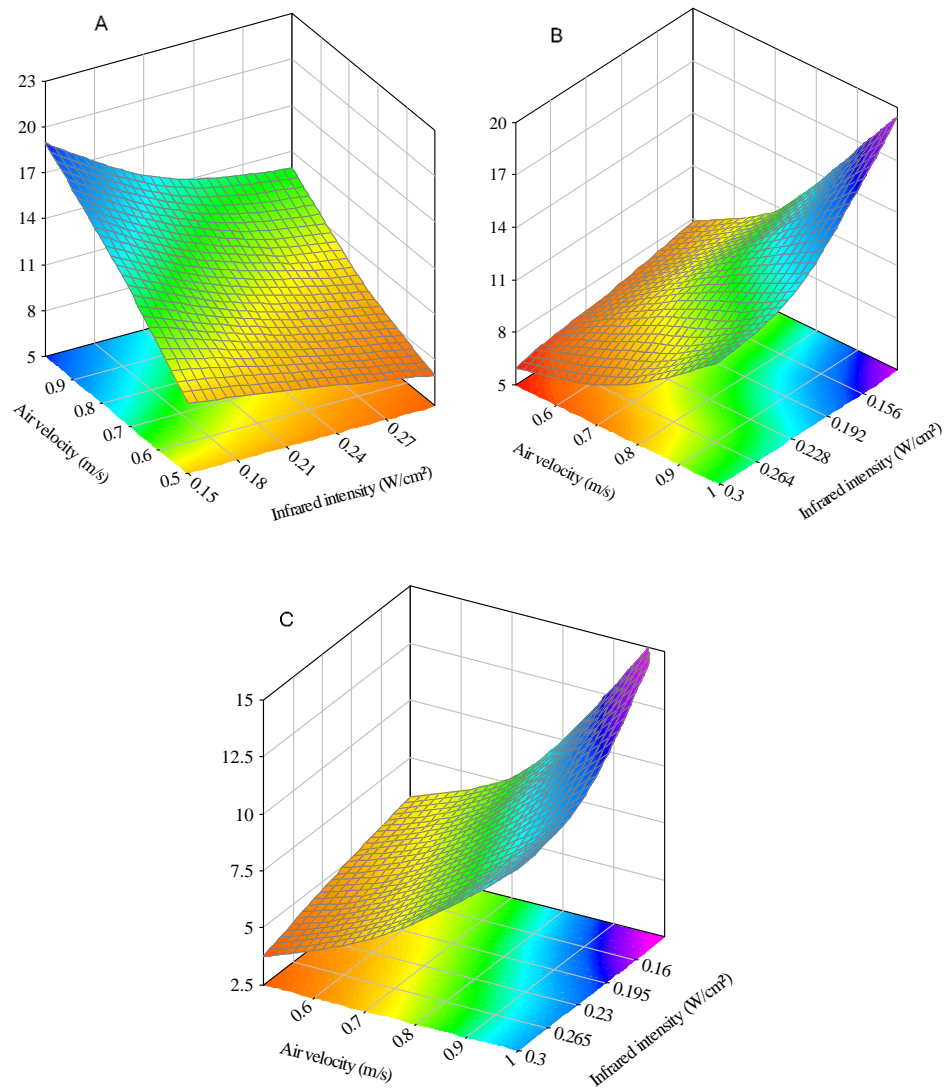

**Figure S7.** Variation of specific energy consumption due to changes in infrared radiation intensity at different air velocities using a combined infrared/hot air convection dryer at 40 °C (A), 50 °C (B) and 60 °C (C).
